# Supplementary material
Source: PubMed Central journal article supplement (PMC10310729)

Supplementary Figure 8

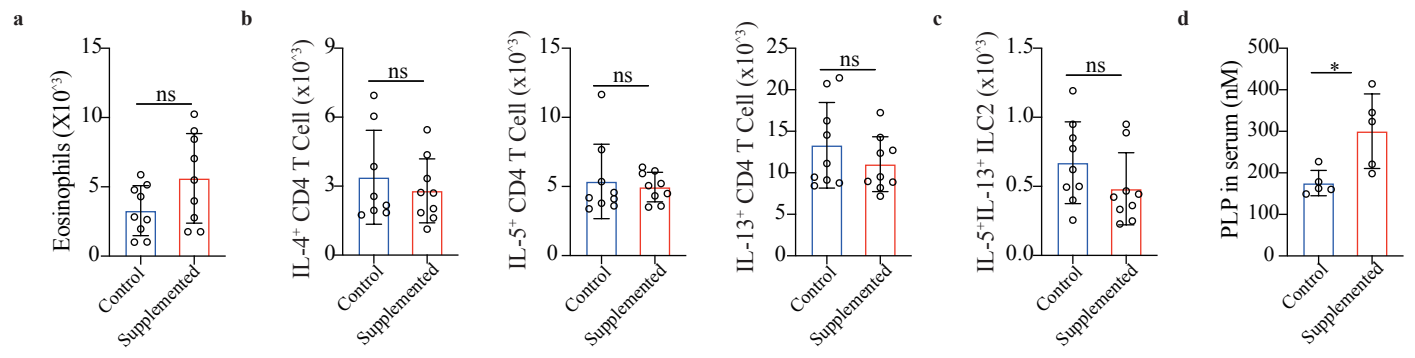

Supplement: 41423_2023_1029_MOESM10_ESM.pdf [file 41423_2023_1029_MOESM10_ESM.pdf]

# Pulmonary epithelial cell

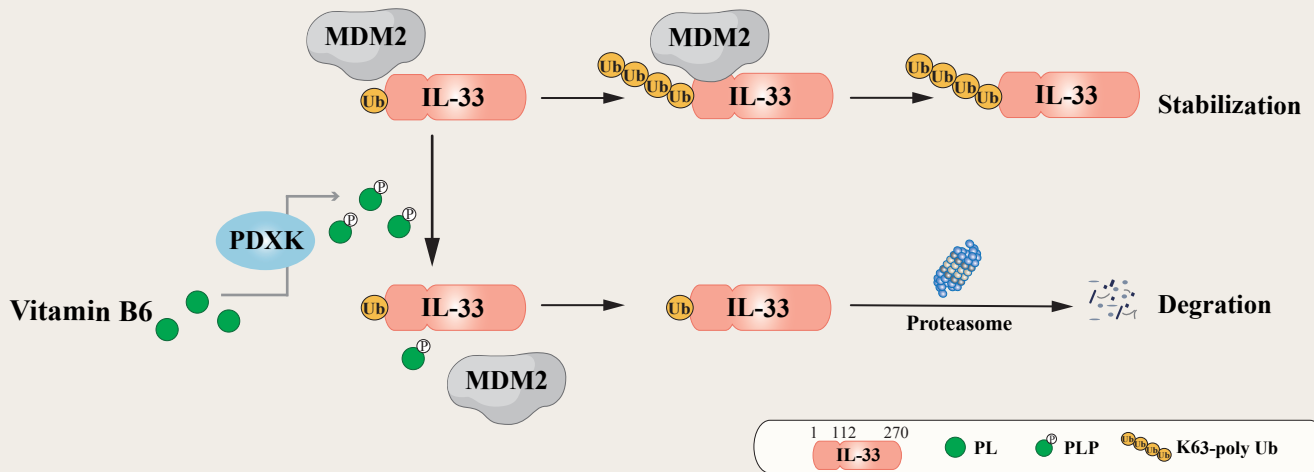

Human asthma

Murine lung inflammation model

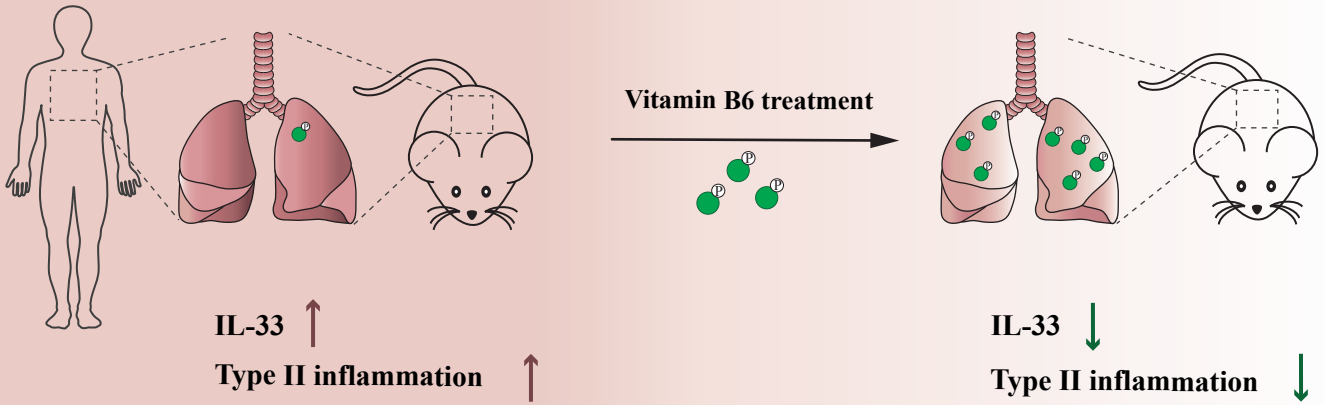

Supplement: 41423_2023_1029_MOESM12_ESM.pdf [file 41423_2023_1029_MOESM12_ESM.pdf]

Supplementary Figure 1

**a**

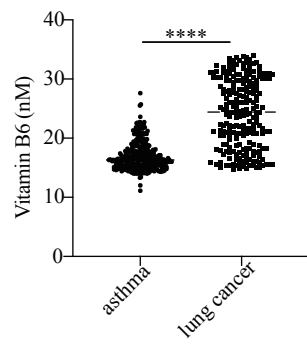

Supplement: 41423_2023_1029_MOESM3_ESM.pdf [file 41423_2023_1029_MOESM3_ESM.pdf]

Supplementary Figure-2

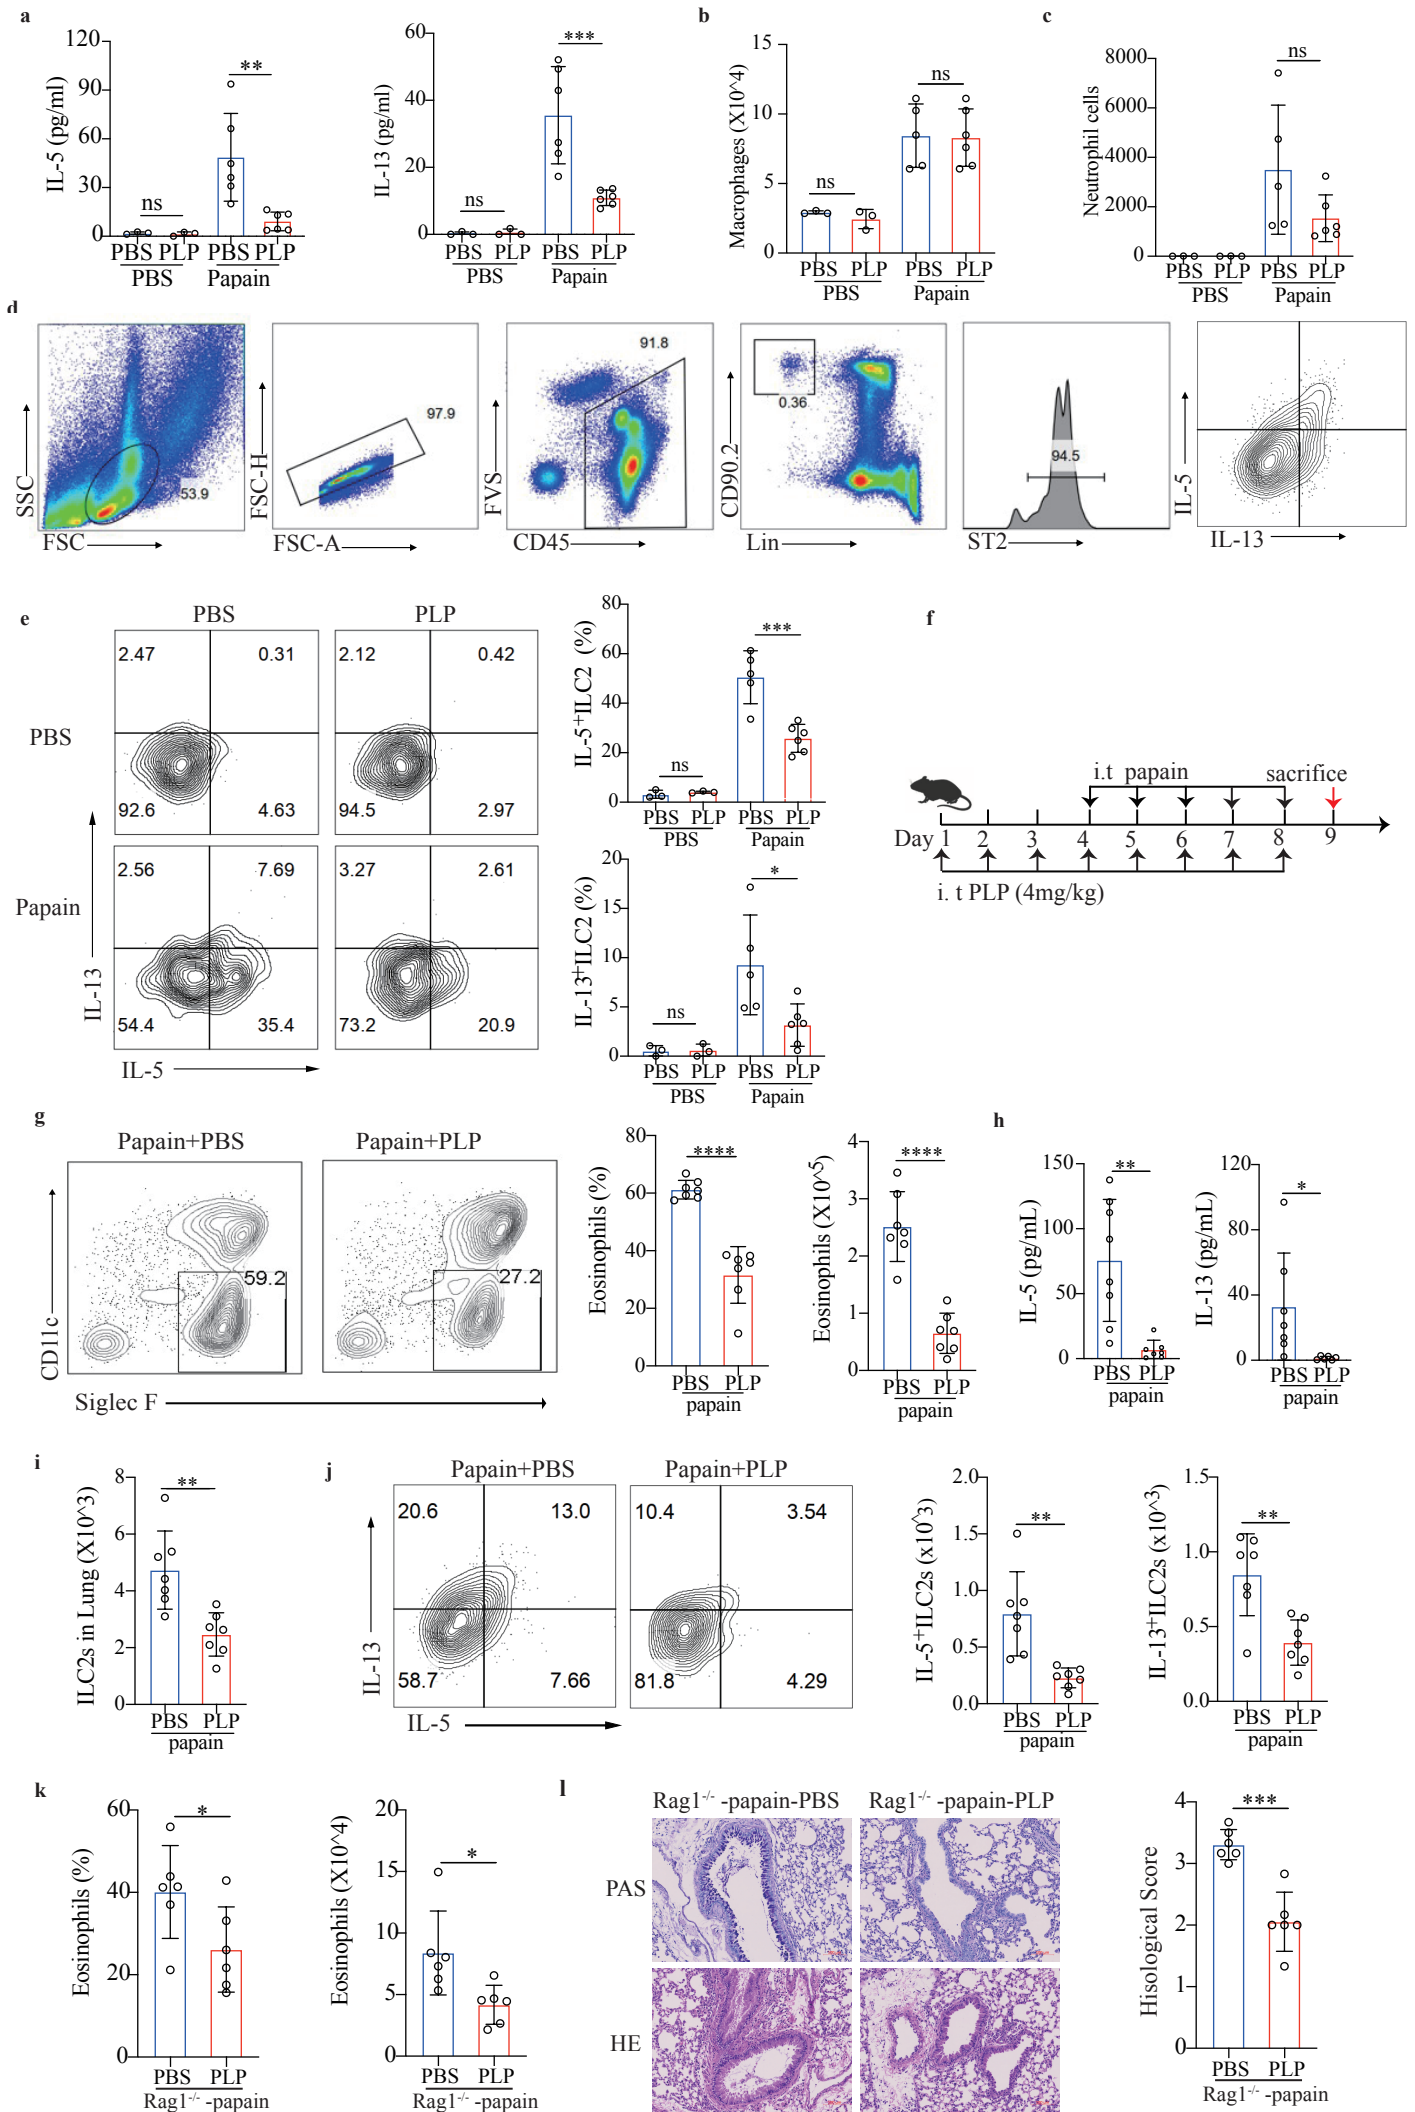

Supplement: 41423_2023_1029_MOESM4_ESM.pdf [file 41423_2023_1029_MOESM4_ESM.pdf]

Supplementary Figure 3

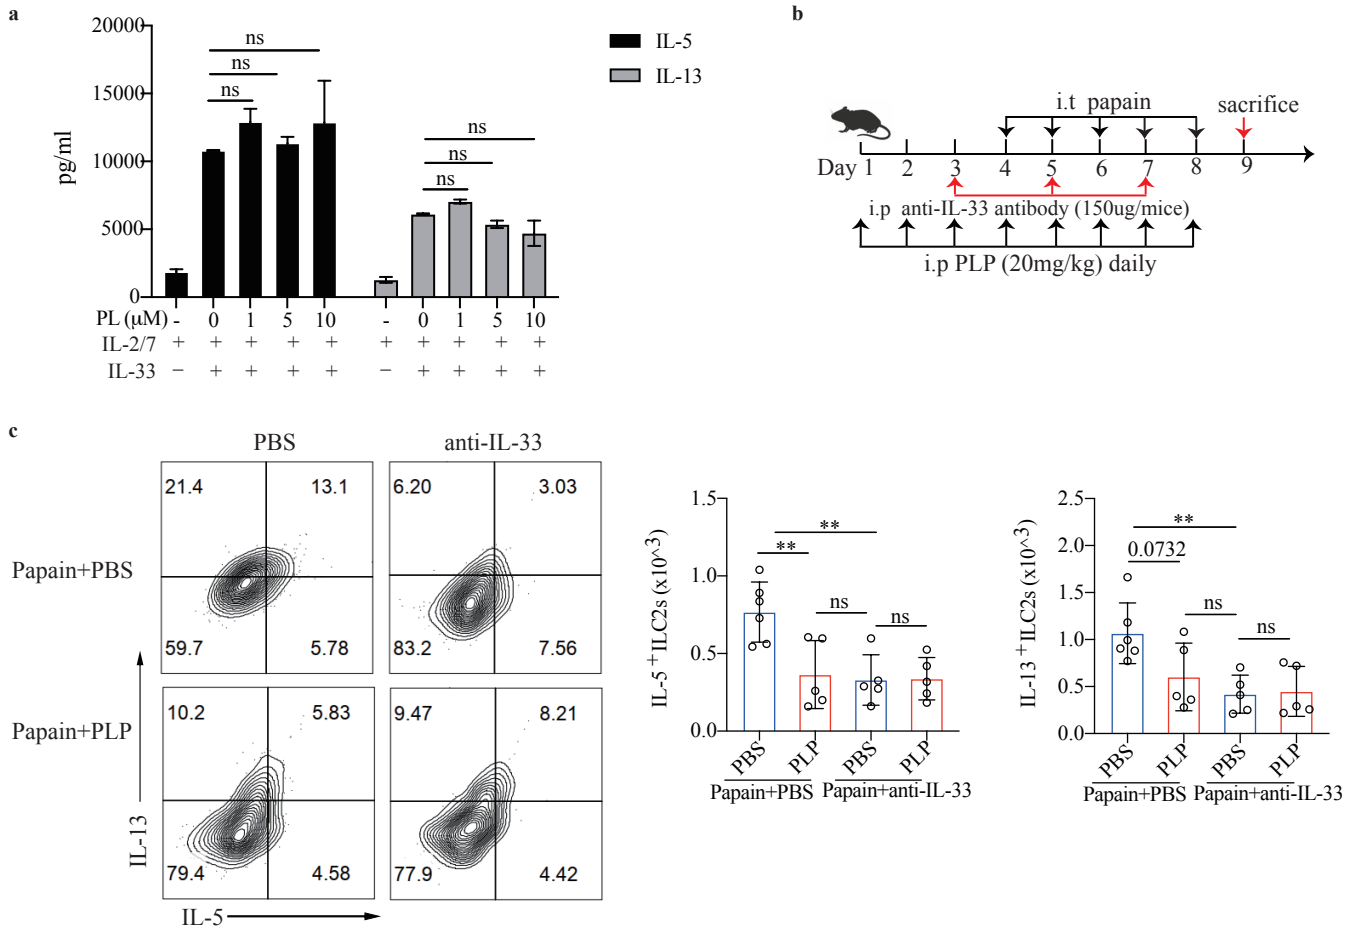

Supplement: 41423_2023_1029_MOESM5_ESM.pdf [file 41423_2023_1029_MOESM5_ESM.pdf]
